# Supplementary material for: Highly sensitive surface acoustic wave biosensor for the detection of Hg2+ based on the thymine–Hg2+–thymine structure
Source: Royal Society of Chemistry journal article supplement (doi:10.1039/d3ay01188g), 2023-01-01

## Supporting Information for

# A high-sensitive surface acoustic wave biosensor for the detection of $\text{Hg}^{2+}$ based on thymine - $\text{Hg}^{2+}$ - thymine structure

Huimin Sun<sup>1</sup>, Chunzhen Yang<sup>1</sup> and Hong Wang\*<sup>1</sup>

<sup>1</sup> School of Materials, Shenzhen Campus of Sun Yat-sen University, Shenzhen 518107, P. R. China.

E-mail: wanghong3@mail.sysu.edu.cn

Fig. S1 Structural formula of obtained T- $\text{Hg}^{2+}$ -T base pair.

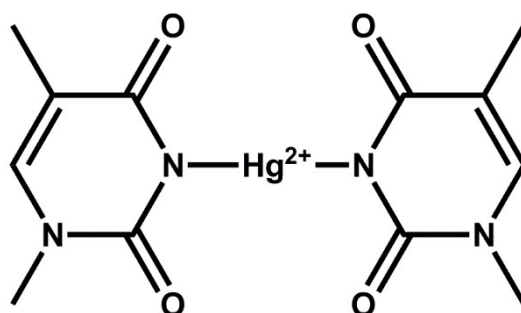

Fig. S2 AFM topological morphology of the sensitive region surface of the SAW biosensor after: (a) DNA probe adsorption, (b) immobilization of  $\text{Hg}^{2+}$ . (c) Section profiles of the white line plotted in (a). (d) Section profile of the white line plotted in (b).

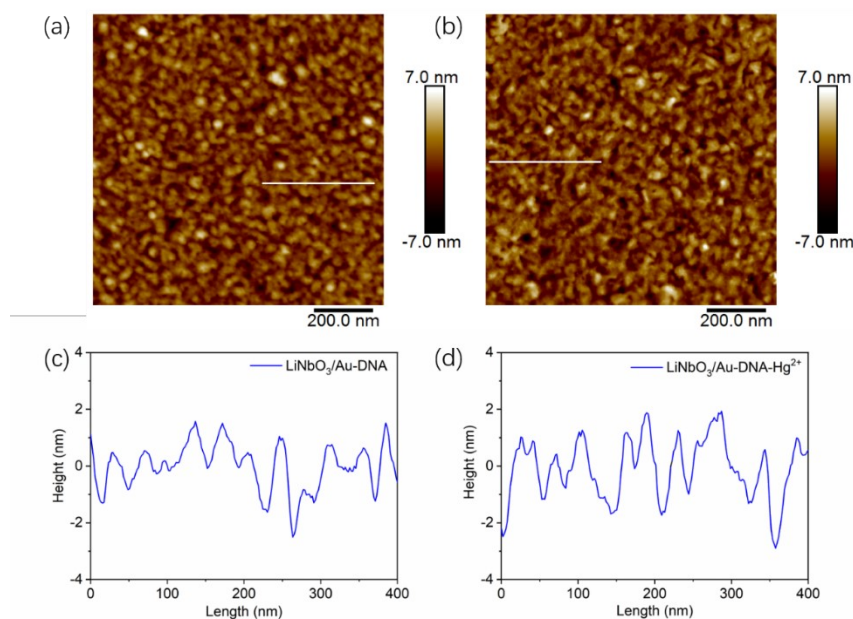

Fig. S3 The CAM of  $\text{LiNbO}_3$  surface.

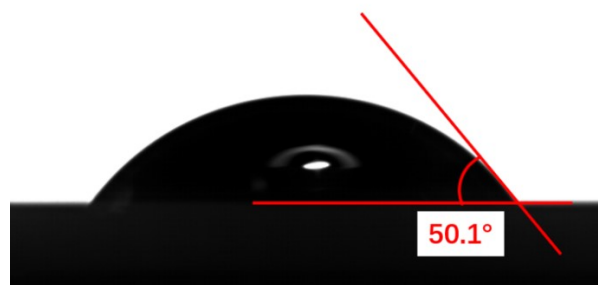

Fig. S4 (a) The SAW biosensor exhibited distinct responses to mixtures containing  $\text{Hg}^{2+}$  (0.5 nM) with  $\text{Ag}^+$  (1 nM) or  $\text{Na}^+$  (1 nM) in comparison to the individual pure solutions. (b) A comparative analysis was conducted on the responses of the proposed SAW biosensor to a mixture containing 0.1 nM  $\text{Hg}^{2+}$  solution and 1 nM  $\text{Na}^+$  solution against the responses to the respective individual pure solutions. Error bars indicate the standard deviation.

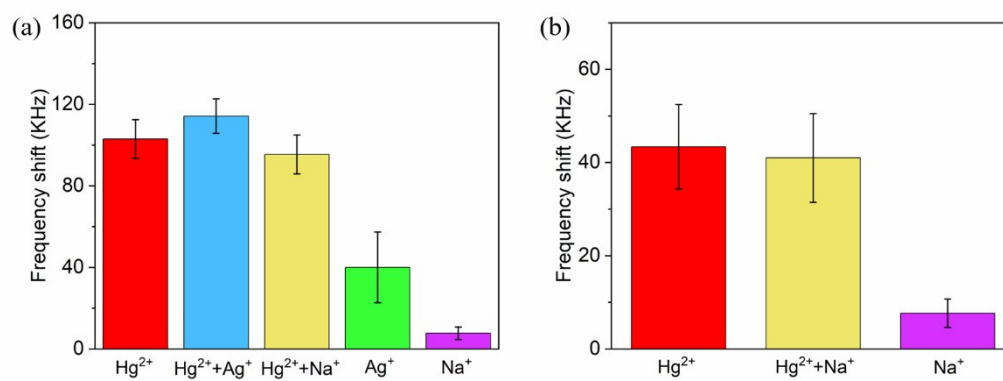

Supplement: d3ay01188g1.pdf [file d3ay01188g1.pdf]
